# Supplementary material
Source: PubMed Central journal article supplement (PMC8010717)

In the format provided by the authors and unedited.

# Overcoming Wnt- $\beta$ -catenin dependent anticancer therapy resistance in leukaemia stem cells

John M. Perry<sup>1,2,3,4</sup>, Fang Tao<sup>1,2</sup>, Anuradha Roy<sup>5</sup>, Tara Lin<sup>6</sup>, Xi C. He<sup>1</sup>, Shiyuan Chen<sup>1</sup>, Xiuling Lu<sup>6</sup>, Jacqelyn Nemecek<sup>2</sup>, Linhao Ruan<sup>1,13</sup>, Xiazhen Yu<sup>1,14</sup>, Debra Dukes<sup>1</sup>, Andrea Moran<sup>1</sup>, Jennifer Pace<sup>1,2</sup>, Kealan Schroeder<sup>2</sup>, Meng Zhao<sup>1,15</sup>, Aparna Venkatraman<sup>1</sup>, Pengxu Qian<sup>1,16,17</sup>, Zhenrui Li<sup>1,18</sup>, Mark Hembree<sup>1</sup>, Ariel Paulson<sup>1</sup>, Zhiquan He<sup>7</sup>, Dong Xu<sup>7</sup>, Thanh-Huyen Tran<sup>6,19</sup>, Prashant Deshmukh<sup>8</sup>, Chi Thanh Nguyen<sup>9</sup>, Rajeswari M. Kasi<sup>8,9</sup>, Robin Ryan<sup>2</sup>, Melinda Broward<sup>3</sup>, Sheng Ding<sup>10</sup>, Erin Guest<sup>2</sup>, Keith August<sup>1,2</sup>, Alan S. Gamis<sup>2</sup>, Andrew Godwin<sup>3</sup>, G. Sitta Sittampalam<sup>3,20</sup>, Scott J. Weir<sup>11</sup> and Linheng Li<sup>1,12</sup> ✉

<sup>1</sup>Stowers Institute for Medical Research, Kansas City, MO, USA. <sup>2</sup>Children's Mercy Kansas City, Kansas City, MO, USA. <sup>3</sup>University of Kansas Medical Center, Kansas City, KS, USA. <sup>4</sup>University of Missouri Kansas City School of Medicine, Kansas City, MO, USA. <sup>5</sup>High Throughput Screening Laboratory, University of Kansas, Lawrence, KS, USA. <sup>6</sup>Department of Pharmaceutical Sciences, University of Connecticut, Storrs, CT, USA. <sup>7</sup>Department of Electrical Engineering and Computer Science and C.S. Bond Life Sciences Center, University of Missouri, Columbia, MO, USA. <sup>8</sup>Polymer Program, Institute of Materials Science, University of Connecticut, Storrs, CT, USA. <sup>9</sup>Department of Chemistry, University of Connecticut, Storrs, CT, USA. <sup>10</sup>School of Pharmaceutical Science, Tsinghua University, Beijing, China. <sup>11</sup>Department of Cancer Biology, The Institute for Advancing Medical Innovation and University of Kansas Cancer Center, Kansas City, Kansas, USA. <sup>12</sup>Department of Pathology and Laboratory Medicine and Division of Medical Oncology, Internal Medicine, University of Kansas Medical Center, Kansas City, KS, USA. <sup>13</sup>Present address: Center for Cell Dynamics, Department of Cell Biology, School of Medicine, Johns Hopkins University, Baltimore, MD, USA. <sup>14</sup>Present address: Department of Hepatobiliary and Pancreatic Surgery, First Affiliated Hospital, Zhejiang University School of Medicine, Hangzhou, China. <sup>15</sup>Present address: Key Laboratory of Stem Cells and Tissue Engineering, Ministry of Education, Sun Yat-sen University, Guangzhou, Guangdong, China. <sup>16</sup>Present address: Center of Stem Cell and Regenerative Medicine and Bone Marrow Transplantation Center of the First Affiliated Hospital, Zhejiang University School of Medicine, Hangzhou, China. <sup>17</sup>Present address: Institute of Hematology, Zhejiang University and Zhejiang Engineering Laboratory for Stem Cell and Immunotherapy, Hangzhou, China. <sup>18</sup>Present address: St. Jude, Memphis, TN, USA. <sup>19</sup>Present address: Department of Pharmaceutical Sciences, Northeastern University, Boston, MA, US. <sup>20</sup>Present address: Therapeutics for Rare and Neglected Diseases, National Center for Advancing Translational Sciences, National Institutes of Health, Rockville, MD, USA. ✉e-mail: [lil@stowers.org](mailto:lil@stowers.org)

# ATACseq Analysis QC Report

*Analyst: Shiyuan (Cynthia) Chen*

*08 October, 2019*

## 1. ATAC-seq Samples Details

ATAC-seq libraries were sequenced as 76bp paired-end reads on Illumina Nextseq 500 machine. Raw sequencing reads were demultiplexed into Fastq file format using Illumina's bcl2fastq v2.20.

Table 1: Table continues below

| SampleRawFile                  | LibraryID | Group               |
|--------------------------------|-----------|---------------------|
| Blast_Vehicle_Rep1_R1.fastq.gz | L36692    | Blast Vehicle       |
| Blast_Vehicle_Rep1_R2.fastq.gz | L36692    | Blast Vehicle       |
| Blast_Vehicle_Rep2_R1.fastq.gz | L36974    | Blast Vehicle       |
| Blast_Vehicle_Rep2_R2.fastq.gz | L36974    | Blast Vehicle       |
| Blast_Vehicle_Rep3_R1.fastq.gz | L36975    | Blast Vehicle       |
| Blast_Vehicle_Rep3_R2.fastq.gz | L36975    | Blast Vehicle       |
| Blast_LowDox_Rep1_R1.fastq.gz  | L37176    | Blast LowDoxTreated |
| Blast_LowDox_Rep1_R2.fastq.gz  | L37176    | Blast LowDoxTreated |
| Blast_LowDox_Rep2_R1.fastq.gz  | L37177    | Blast LowDoxTreated |
| Blast_LowDox_Rep2_R2.fastq.gz  | L37177    | Blast LowDoxTreated |
| LSC_Vehicle_Rep1_R1.fastq.gz   | L37772    | LSC Vehicle         |
| LSC_Vehicle_Rep1_R2.fastq.gz   | L37772    | LSC Vehicle         |
| LSC_Vehicle_Rep2_R1.fastq.gz   | L37773    | LSC Vehicle         |
| LSC_Vehicle_Rep2_R2.fastq.gz   | L37773    | LSC Vehicle         |
| LSC_LowDox_R1.fastq.gz         | L37175    | LSC LowDoxTreated   |
| LSC_LowDox_R2.fastq.gz         | L37175    | LSC LowDoxTreated   |

| IndexSequence | Read | Type         | ReadLength |
|---------------|------|--------------|------------|
| CGTACTAG      | 1    | Paired Reads | 76         |
| CGTACTAG      | 2    | Paired Reads | 76         |
| TAAGGCCGA     | 1    | Paired Reads | 76         |
| TAAGGCCGA     | 2    | Paired Reads | 76         |
| AGGCAGAA      | 1    | Paired Reads | 76         |
| AGGCAGAA      | 2    | Paired Reads | 76         |
| CGTACTAG      | 1    | Paired Reads | 76         |
| CGTACTAG      | 2    | Paired Reads | 76         |
| AGGCAGAA      | 1    | Paired Reads | 76         |
| AGGCAGAA      | 2    | Paired Reads | 76         |
| CGTACTAG      | 1    | Paired Reads | 76         |
| CGTACTAG      | 2    | Paired Reads | 76         |
| AGGCAGAA      | 1    | Paired Reads | 76         |
| AGGCAGAA      | 2    | Paired Reads | 76         |
| TAAGGCCGA     | 1    | Paired Reads | 76         |
| TAAGGCCGA     | 2    | Paired Reads | 76         |

## 2. Analysis Method

Reference: ENCODE Guildlines (<https://www.encodeproject.org/atac-seq/>)

### Step1: Adapter Trimming

For data quality processing, 3' Nextera adapter CTGTCTCTTATA was first removed using cutadapt for both pairs. In addition, reads with at least 8bp overlap and at most 20% mismatches were kept for alignment. Pairs whose trimmed reads (R1 or R2) have length less than 50 bp will be discarded as well. After filtering, more than 94% of reads are kept for next step.

| Sample             | TotalReads | FilteredReads | FilterPercentage |
|--------------------|------------|---------------|------------------|
| Blast_Vehicle_Rep1 | 334884294  | 322612928     | 96.336%          |
| Blast_Vehicle_Rep2 | 331761640  | 315160628     | 94.996%          |
| Blast_LowDox_Rep1  | 346941242  | 335947632     | 96.831%          |
| Blast_LowDox_Rep2  | 182890478  | 178860880     | 97.797%          |
| LSC_Vehicle_Rep1   | 127426602  | 124461096     | 97.673%          |
| LSC_Vehicle_Rep2   | 114023880  | 110513182     | 96.921%          |
| LSC_LowDox         | 224299808  | 214672574     | 95.708%          |

### Step2: Alignment using Bowtie2

Trimmed high quality reads were aligned to mm10 genome using bowtie2 with parameters “-X 2000 -very-sensitive”. All samples have more than 95% overall alignment rate.

- Total - Number of read pairs after filtering
- AlignPerc - Number of pairs which aligned, including single and multiple mappings

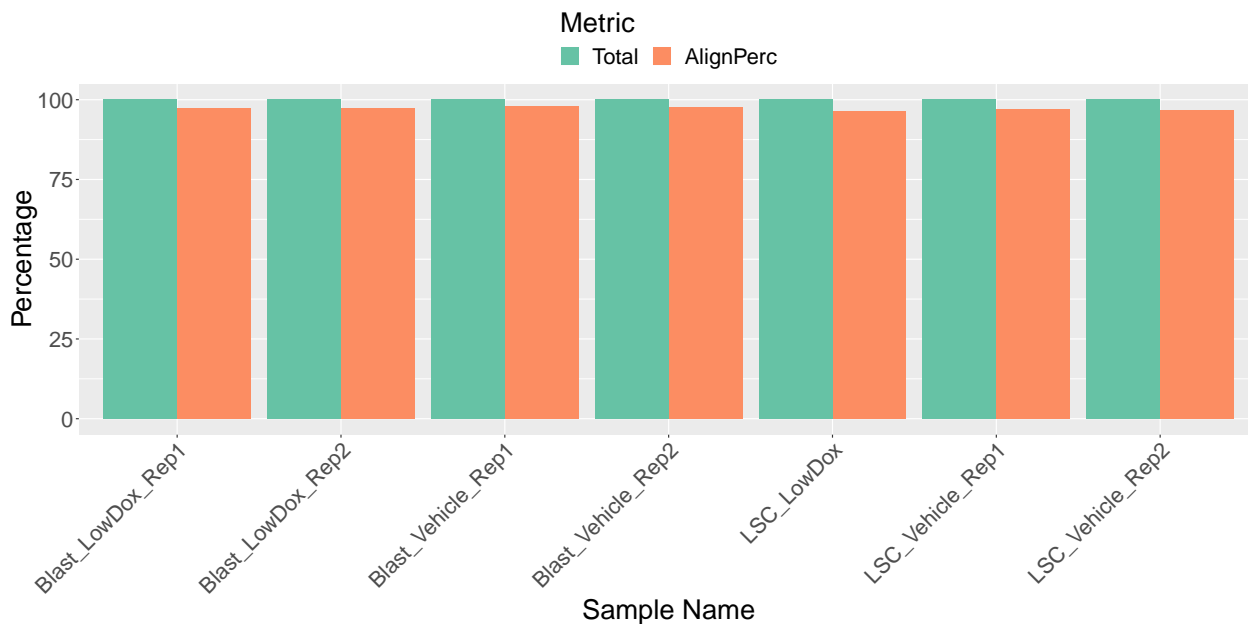

### Step3: Mitochondrial and Duplicated Reads Removal

After alignment, reads that mapped to mitochondrial chromosome were removed using samtools. Also, duplicated reads were evaluated and removed using Picard.

- Total - Number of read pairs after filtering
- MitoDedupPerc - Percentage of reads mapped to mitochondrial chromosome and are duplicated.

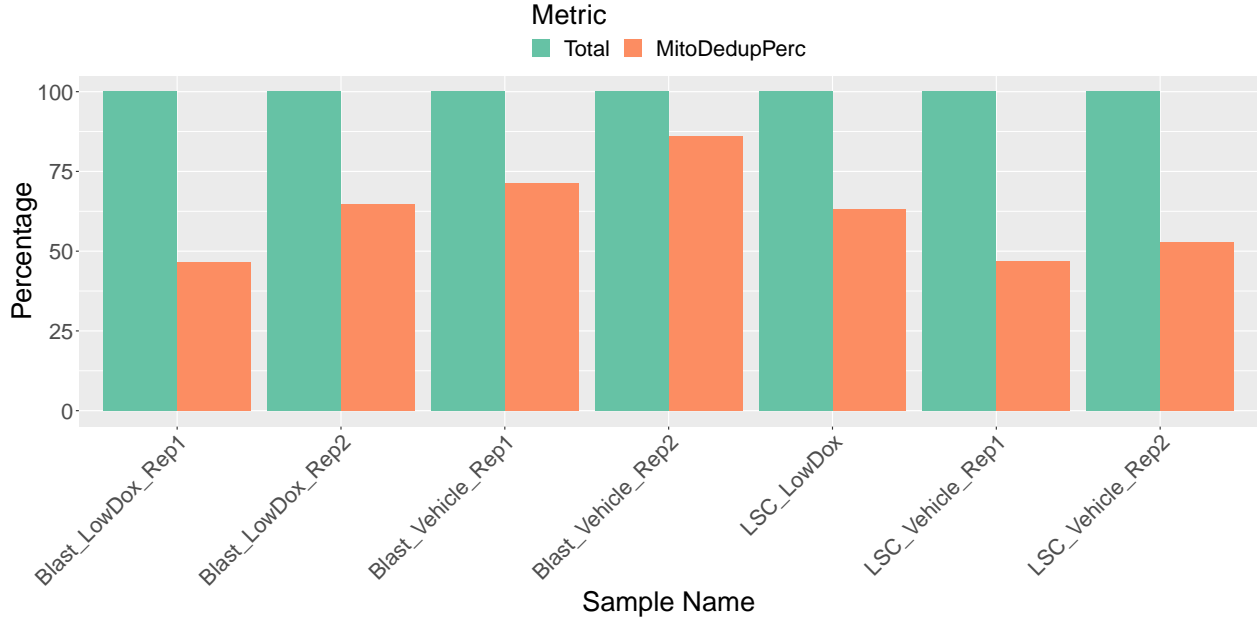

### Summary

After all the data preprocessing, we have 46M ~ 174M reads left for samples, whose reads are primary alignments, proper-paired, and not duplicated.

| Sample             | FinalProcessedReads |
|--------------------|---------------------|
| Blast_Vehicle_Rep1 | 90408171            |
| Blast_Vehicle_Rep2 | 42934911            |
| Blast_LowDox_Rep1  | 174938157           |
| Blast_LowDox_Rep2  | 61289871            |
| LSC_Vehicle_Rep1   | 64000207            |
| LSC_Vehicle_Rep2   | 50487364            |
| LSC_LowDox         | 76352900            |

### 3. Sample Correlation

Pearson correlations between samples along with hierarchical clustering. We found high correlation between Blast replicates and LSCVehicle replicates.

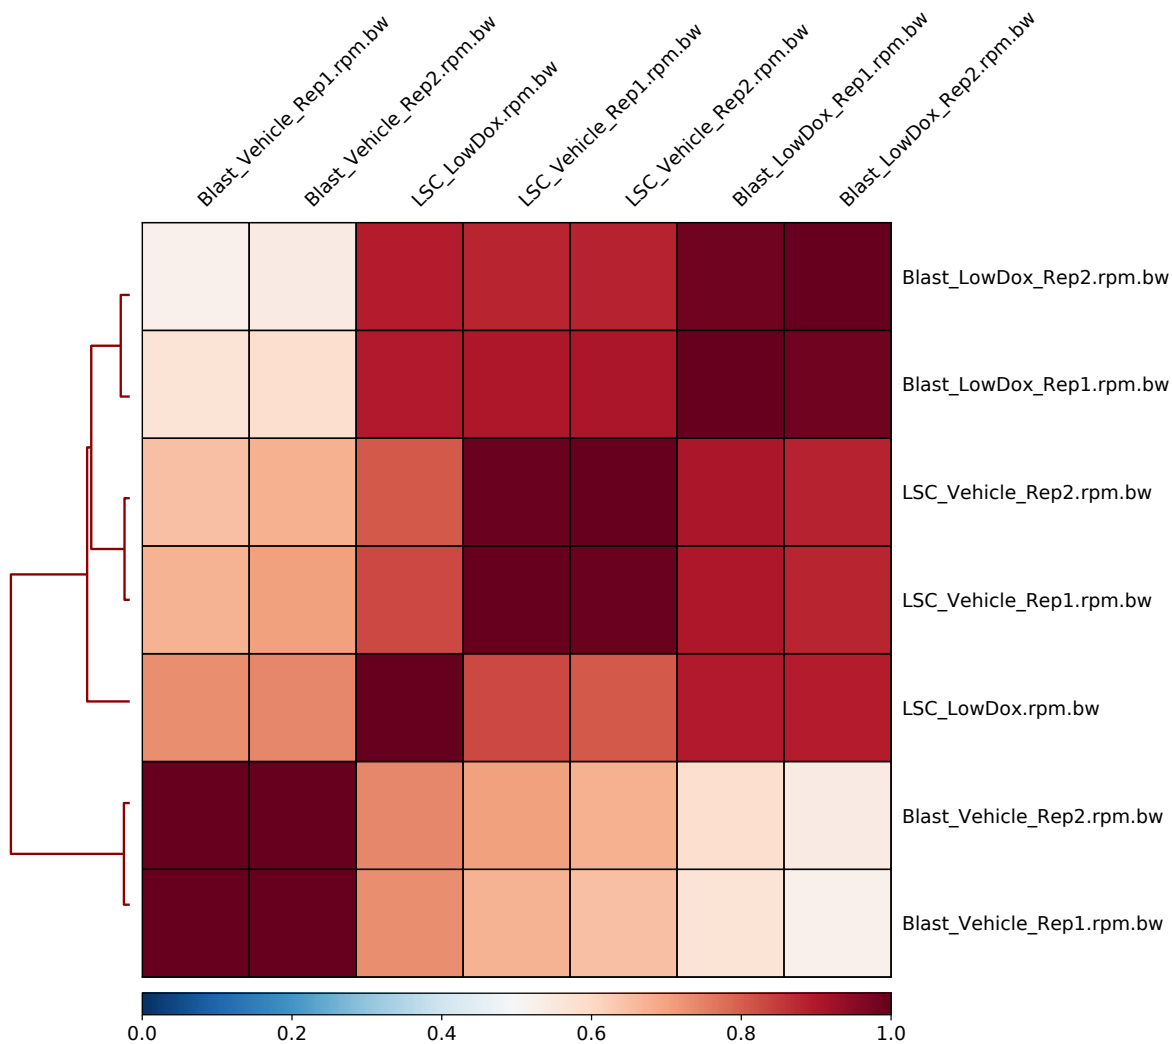

#### 4. Peak calling and differential accessibility analysis

- Peaks were called using MACS2 with parameters “-f BAMPE -q 0.05”. Fragments per million normalized tracks in bigwig format were generated using fragments that are primary alignments, proper-paired, and not duplicated for downstream analysis.
- We take the filtered peaks ( $qvalue < 0.05$ ) and apply R package DiffBind to perform differential accessibility analysis. We compared BlastVehicle vs. BlastLowDox and LSCVehicle vs. LSCLowDox samples, respectively.
- **Due to the starting material restriction and high quality of LSC LowDoxTreated sample, reservoir random sampling (tools: seqtk) was used to create pseudo replicates and generate statistics for the LSC volcano plot.**

## 5. Gene tracks showing unaffected genes after treatment

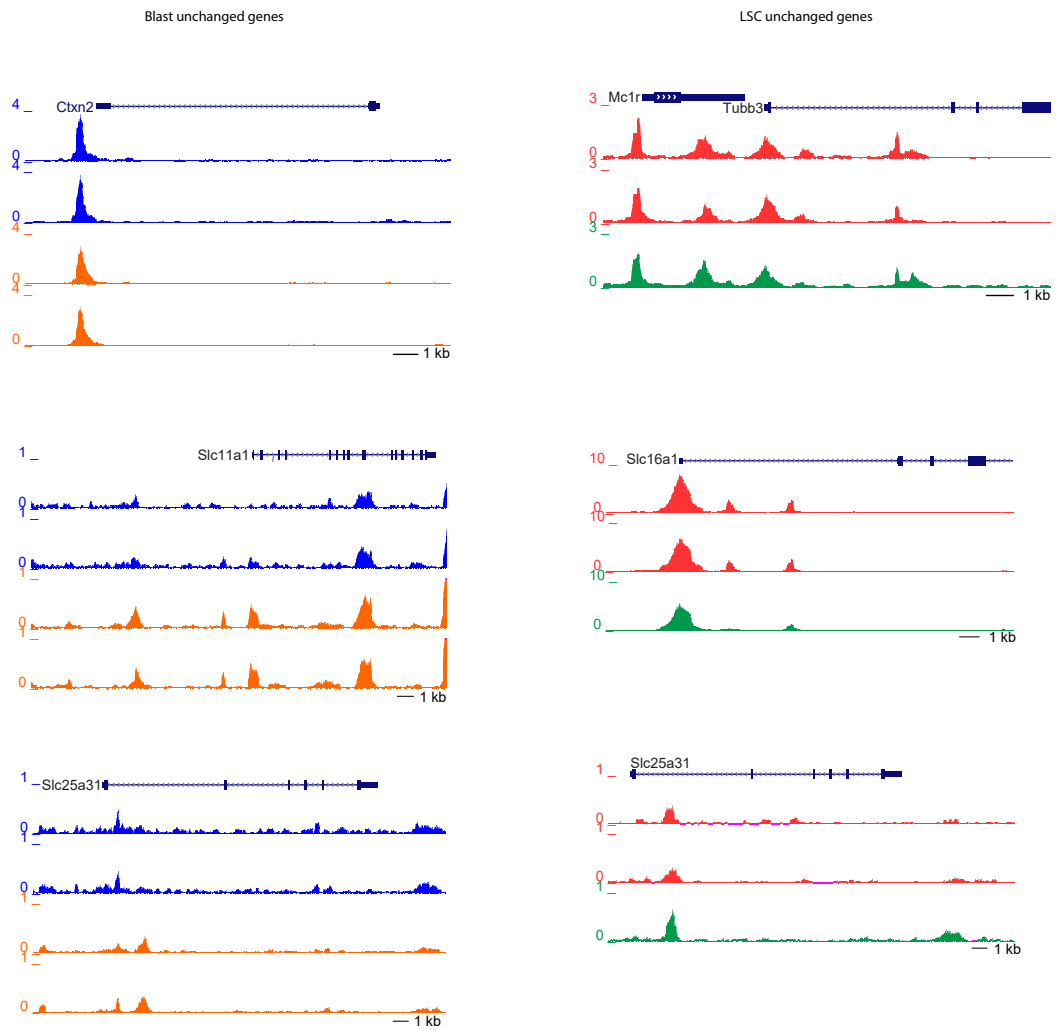

## 6. Gene tracks showing affected gene in LSC cells

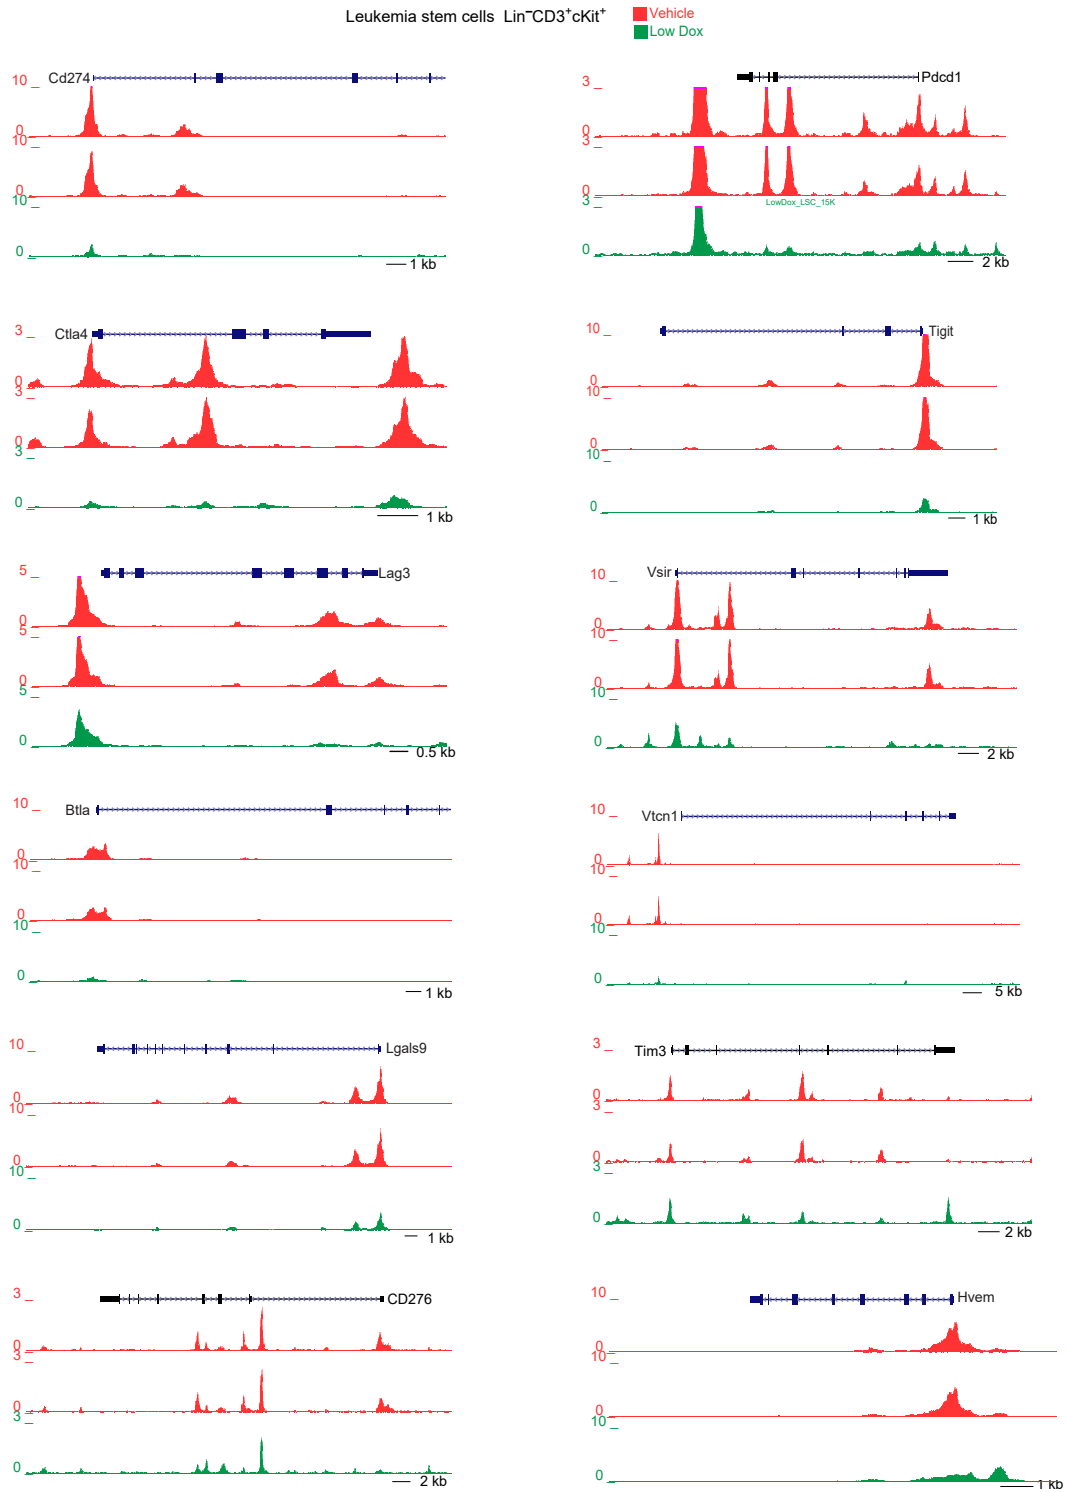

Supplement: NIHMS1677737-supplement-Supplementary_Information.pdf [file NIHMS1677737-supplement-Supplementary_Information.pdf]
