# Supplementary material
Source: PubMed Central journal article supplement (PMC8010717)

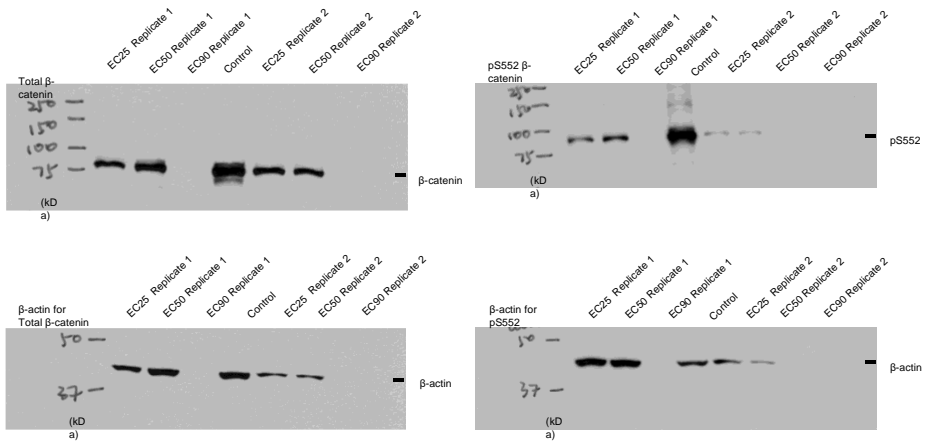

The full scan for figure 2d

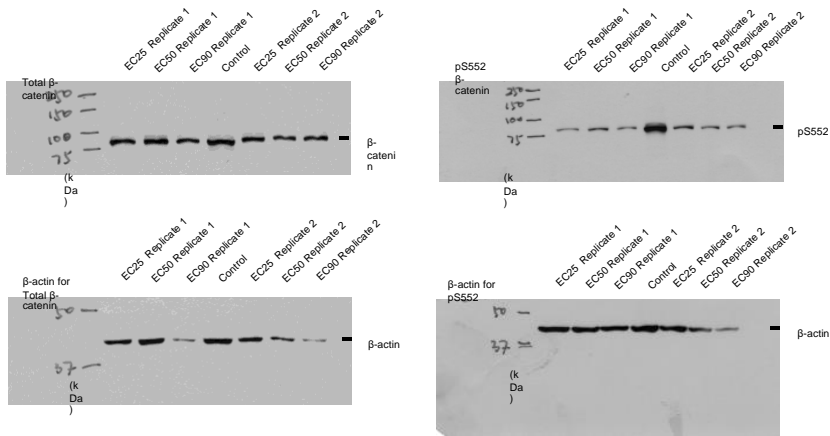

The full scan for figure 2e

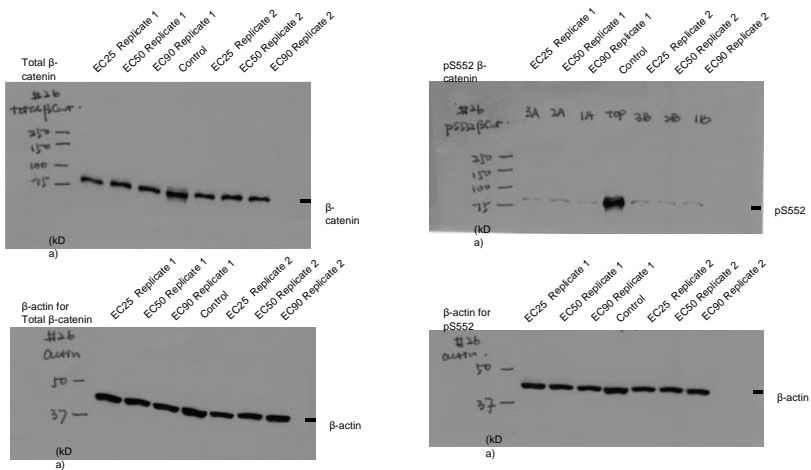

The full scan for figure 2f

Supplement: NIHMS1677737-supplement-Source_Data_Fig_2_Western_Blots.pdf [file NIHMS1677737-supplement-Source_Data_Fig_2_Western_Blots.pdf]
